# Supplementary material
Source: Springer Nature journal article supplement (https://www.springermedizin.de/resource/supplementary/12885_2009_1659_MOESM2_ESM.pdf/9472580)

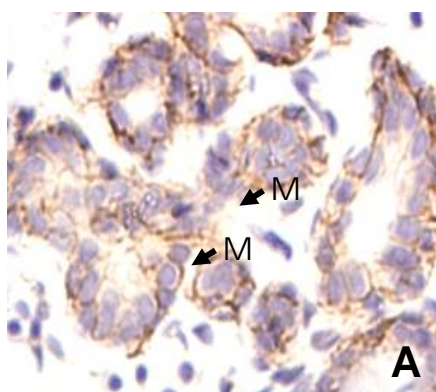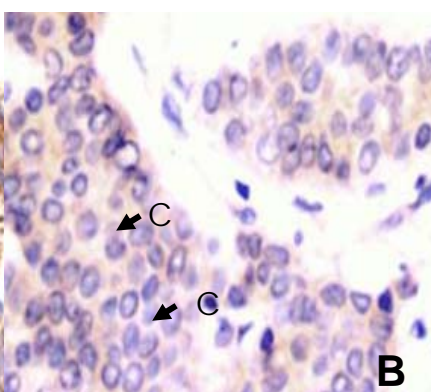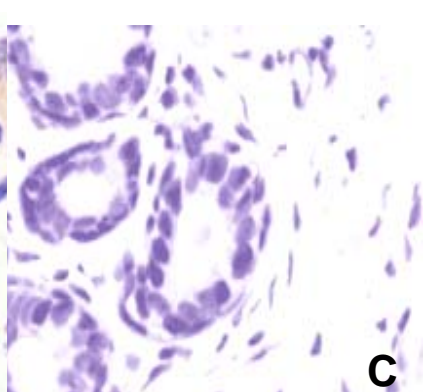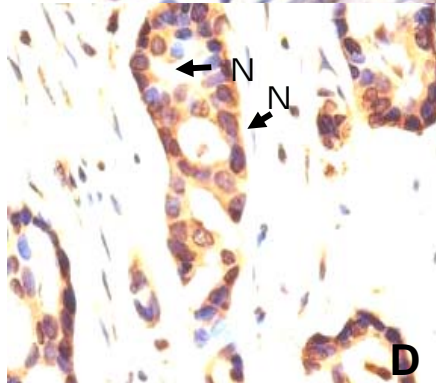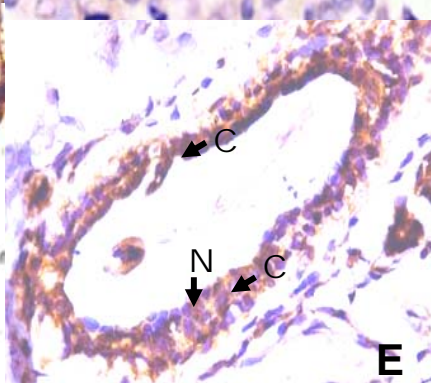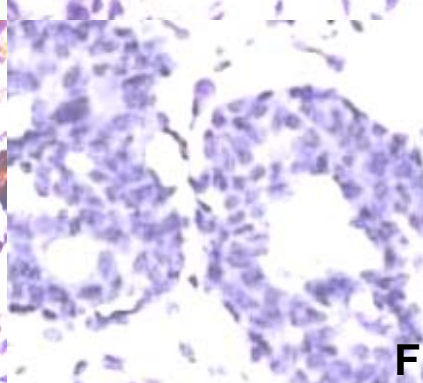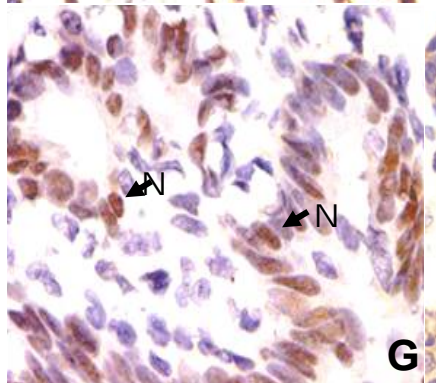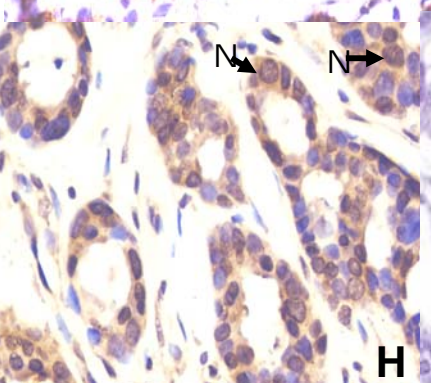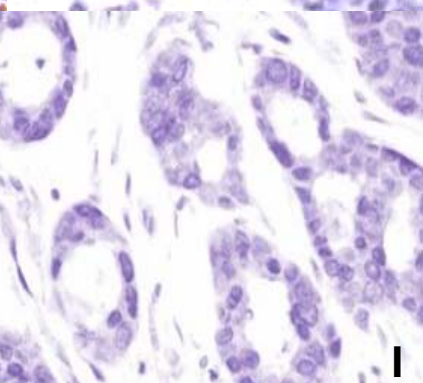

Supplement: MOESM2 [file 9472580]
